# Supplementary material for: Dysfunction of D2 dopamine receptor expressing neurons underlies manic-like behaviors in mice modeling SHANK3 duplication disorder
Source: Research Square preprint supplement (doi:10.21203/rs.3.rs-646721/v1), 2021-07-12
Supplement: Supplementary file 1 [file 4296d91275e491aba9318575.pdf]

A

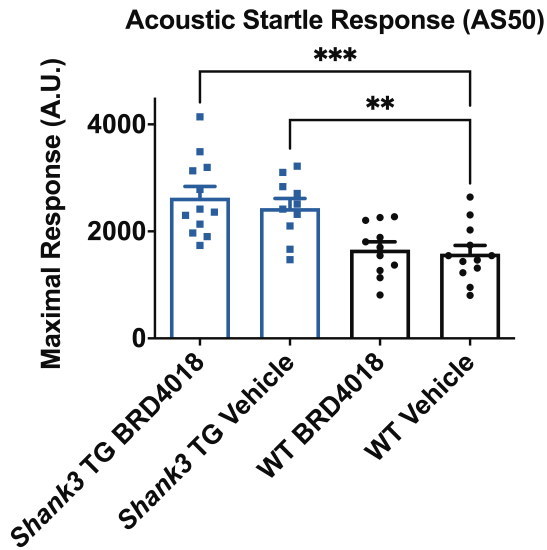

B

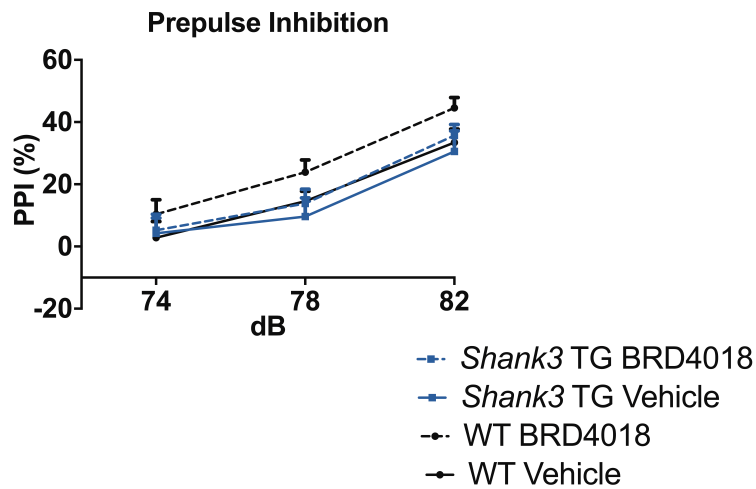

C

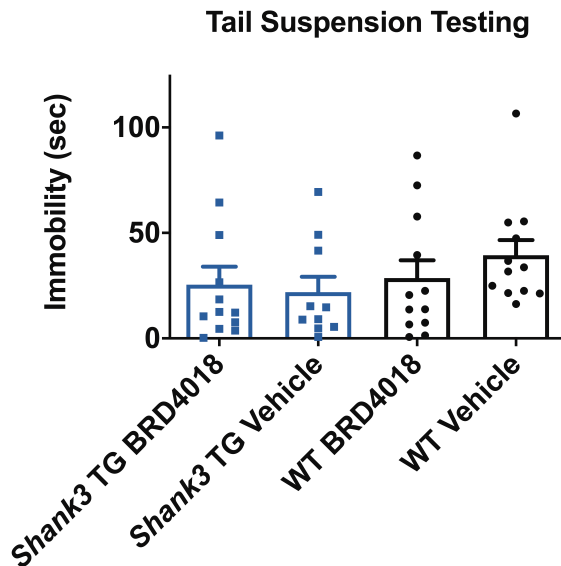

**Supplemental Figure 1  $\beta$ -arrestin biased D2 dopamine receptor antagonists do not rescue acoustic startle response or tail suspension testing abnormalities.** (A) BRD4018 does not rescue elevated acoustic startle response of *Shank3* TG mice. (B) No significant abnormality in prepulse inhibition in *Shank3* TG mice with vehicle injection. (C) No significant abnormality in tail suspension testing of *Shank3* TG mice with vehicle injection. *Shank3* TG BRD4018 N=12, *Shank3* TG vehicle N=10, WT BRD4018 N=11, WT vehicle N=12. One-way nested ANOVA with Dunnett's correction for multiple comparisons. \*\*  $p < 0.01$ , \*\*\*  $p < 0.001$ .
