# Supplementary material for: Dysfunction of D2 dopamine receptor expressing neurons underlies manic-like behaviors in mice modeling SHANK3 duplication disorder
Source: Research Square preprint supplement (doi:10.21203/rs.3.rs-646721/v1), 2021-07-12
Supplement: Supplementary file 2 [file 5c897691faf857f826019031.pdf]

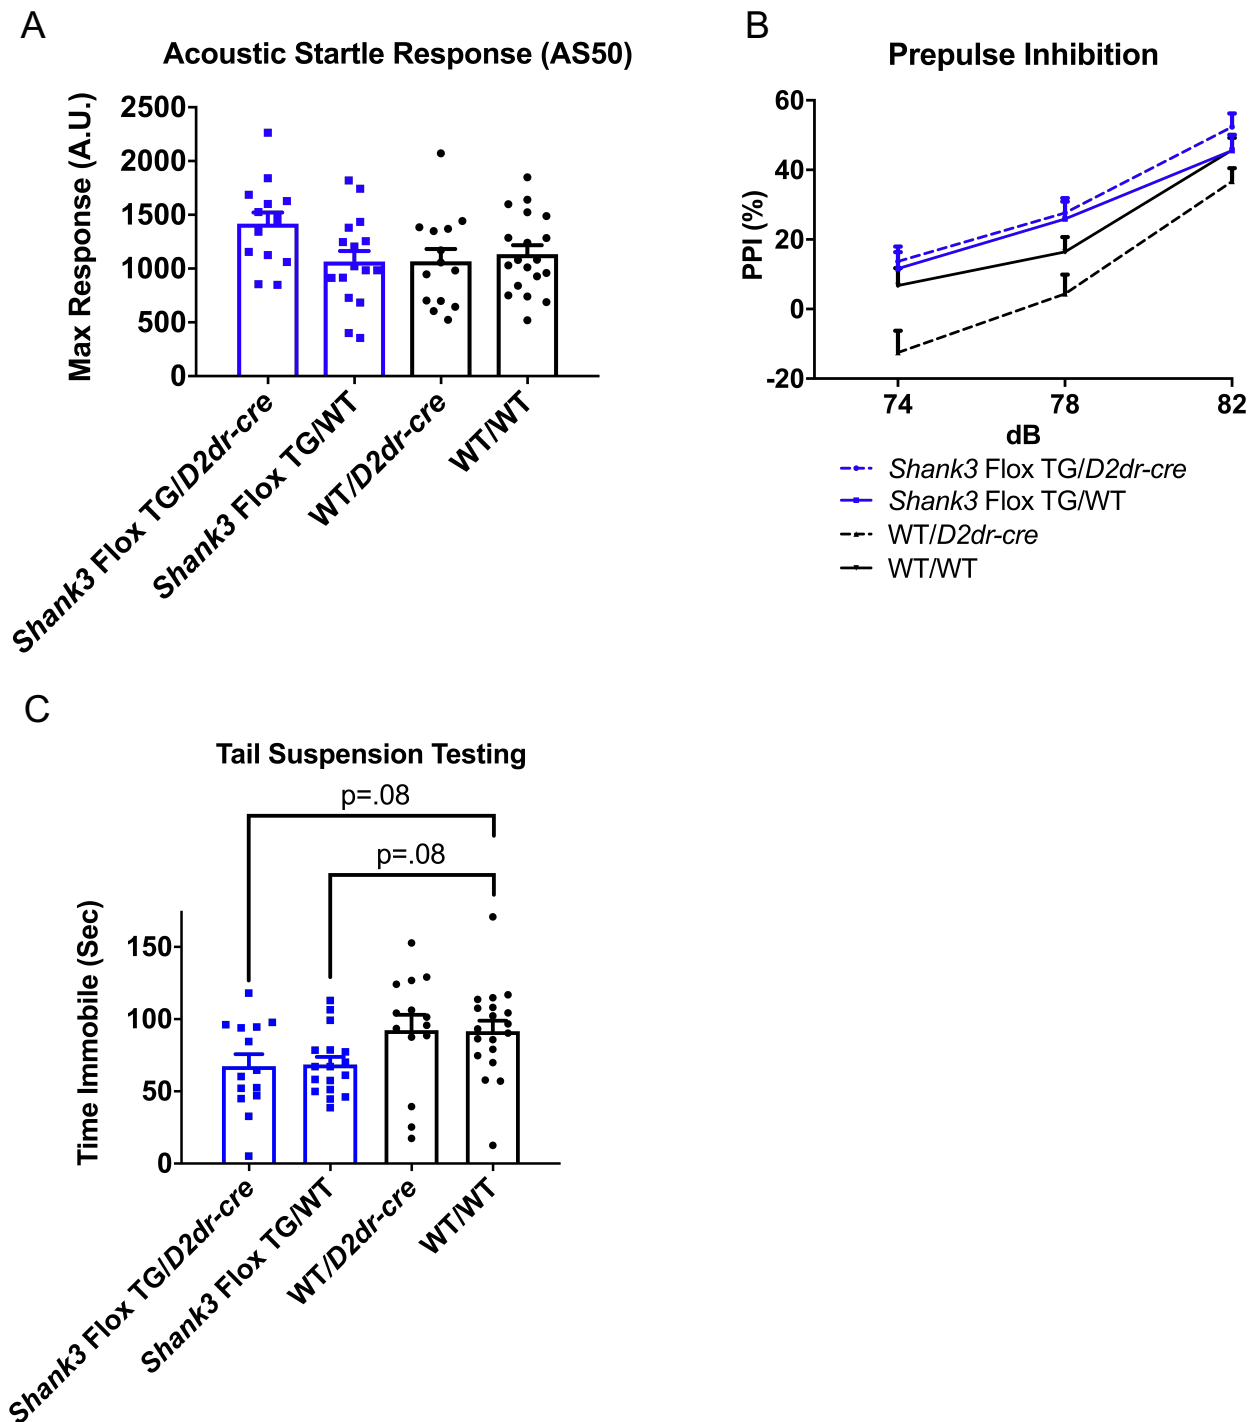

**Supplemental Figure 3 Normalizing *Shank3* in D2 neurons does not alter other behaviors in *Shank3* Flox TG mice.** (A) No alteration in maximal acoustic startle response with normalization of *Shank3* in D2 neurons. One-way ANOVA, NS (B) No significant abnormality in prepulse inhibition in *Shank3* Flox TG mice. (C) No rescue of tail suspension testing abnormalities in *Shank3* Flox TG mice with normalization in D2-neurons, One-way ANOVA ( $p<0.05$ ) with Dunnett's correction for multiple comparisons (NS). *Shank3* Flox TG/D2-Cre N=14, *Shank3* Flox TG N=17, D2-Cre N=14, WT N=19.
